# Supplementary material
Source: publisher figshare collection journal article supplement (https://frontiersin.figshare.com/ndownloader/files/13855985)
Supplement: Supplementary file [file 13855985]

**CD4<sup>+</sup> T cells alter the stromal microenvironment and repress medullary erythropoiesis in murine visceral leishmaniasis. Preham et. al.**

**S1 Table. Distribution of infected mice according to normal values of haematological parameters.**

|                                 | <i>Reference interval</i> | <i>Distribution relative to reference interval (%)</i> |               |              |
|---------------------------------|---------------------------|--------------------------------------------------------|---------------|--------------|
|                                 |                           | <b>Under</b>                                           | <b>Within</b> | <b>Above</b> |
| <i>WBC (x10<sup>3</sup>/ul)</i> | 2.40 - 15.73              | 0                                                      | 100           | 0            |
| <i>NE (x10<sup>3</sup>/ul)</i>  | 0.37 - 5.03               | 0                                                      | 100           | 0            |
| <i>LY (x10<sup>3</sup>/ul)</i>  | 1.96 - 9.01               | 7.69                                                   | 92.31         | 0            |
| <i>MO (x10<sup>3</sup>/ul)</i>  | 0.05 - 0.92               | 0                                                      | 100           | 0            |
| <i>EO (x10<sup>3</sup>/ul)</i>  | 0.01 - 0.71               | 0                                                      | 92.31         | 7.69         |
| <i>BA (x10<sup>3</sup>/ul)</i>  | 0.00 - 0.26               | 0                                                      | 100           | 0            |
| <i>RBC (x10<sup>6</sup>/ul)</i> | 7.04 - 9.18               | 69.23                                                  | 30.77         | 0            |
| <i>HB (g/dl)</i>                | 8.00 - 11.19              | 30.77                                                  | 69.23         | 0            |
| <i>HCT (%)</i>                  | 35.12 - 48.60             | 61.54                                                  | 38.46         | 0            |
| <i>MCV (fl)</i>                 | 47.30 - 55.92             | 0                                                      | 76.92         | 23.08        |
| <i>MCH (pg)</i>                 | 10.16 - 13.56             | 0                                                      | 100           | 0            |
| <i>MCHC (g/dl)</i>              | 18.08 - 28.00             | 0                                                      | 100           | 0            |
| <i>PLT (x10<sup>3</sup>/ul)</i> | 241.20 - 924.80           | 38.46                                                  | 61.54         | 0            |
| <i>MPV (fl)</i>                 | 3.60 - 5.00               | 0                                                      | 23.08         | 76.92        |

## Supplementary Figures

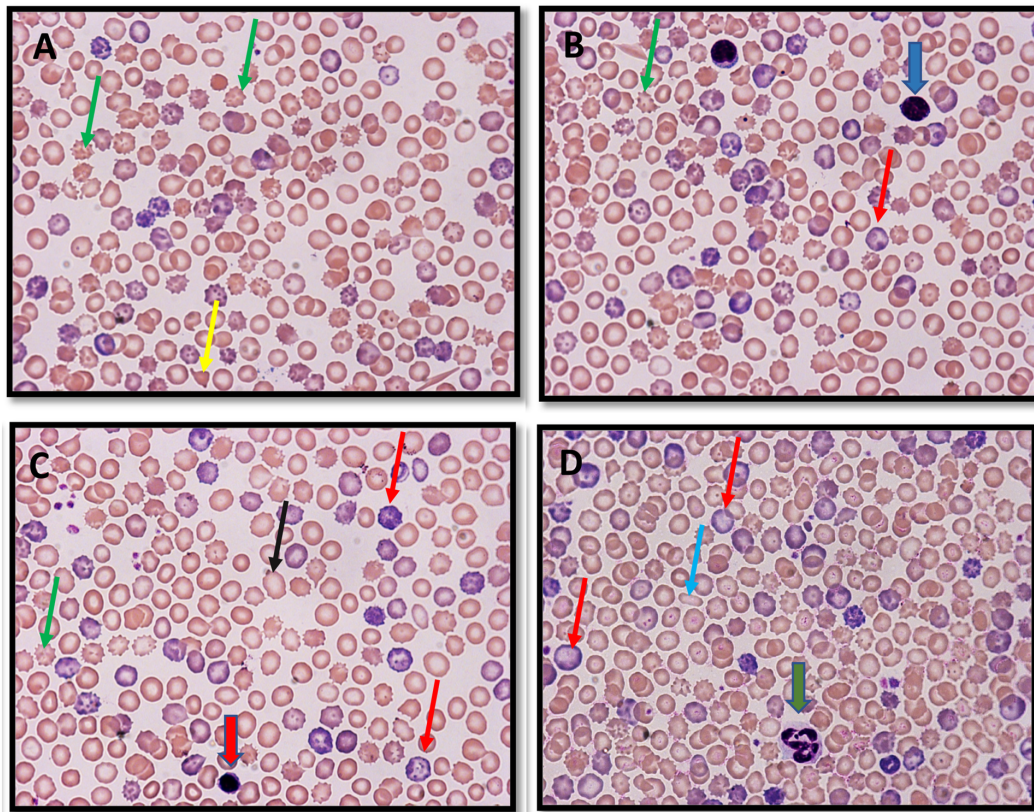

### S1 Figure Aberrant red cell morphology following *L. donovani* infection

Representative images of M-G Giemsa-stained blood films from d28 *L. donovani*-infected mice. **A.** green thin arrow: acanthocytes; yellow thin arrow: schistocytes; **B.** red thin arrow: polychromatic red cells; blue large arrow: lymphocyte; **C.** red large arrow: nucleated red blood cell; black thin arrow: macrocyte; **D.** green large arrow: neutrophil. blue thin arrow: elliptocyte

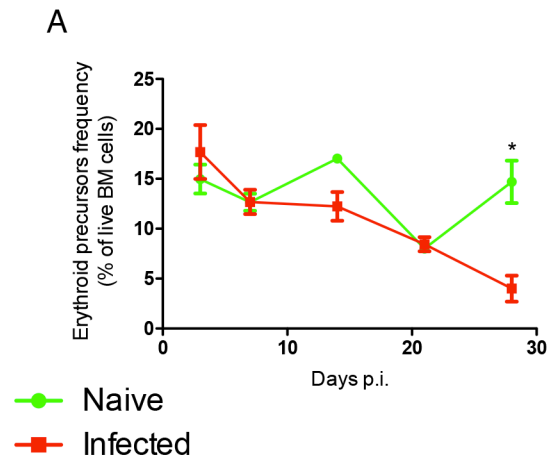

**S2 Figure. Frequency of erythroid precursors in bone marrow.**

Frequency of erythroid precursors (pro-erythroblasts and erythroblasts) in the bone marrow of naïve (green) and *L. donovani*-infected (red) B6 mice over time. Precursors were identified on the basis of TER119 and CD71 staining. Unpaired t-test; n=3 mice per group per timepoint).

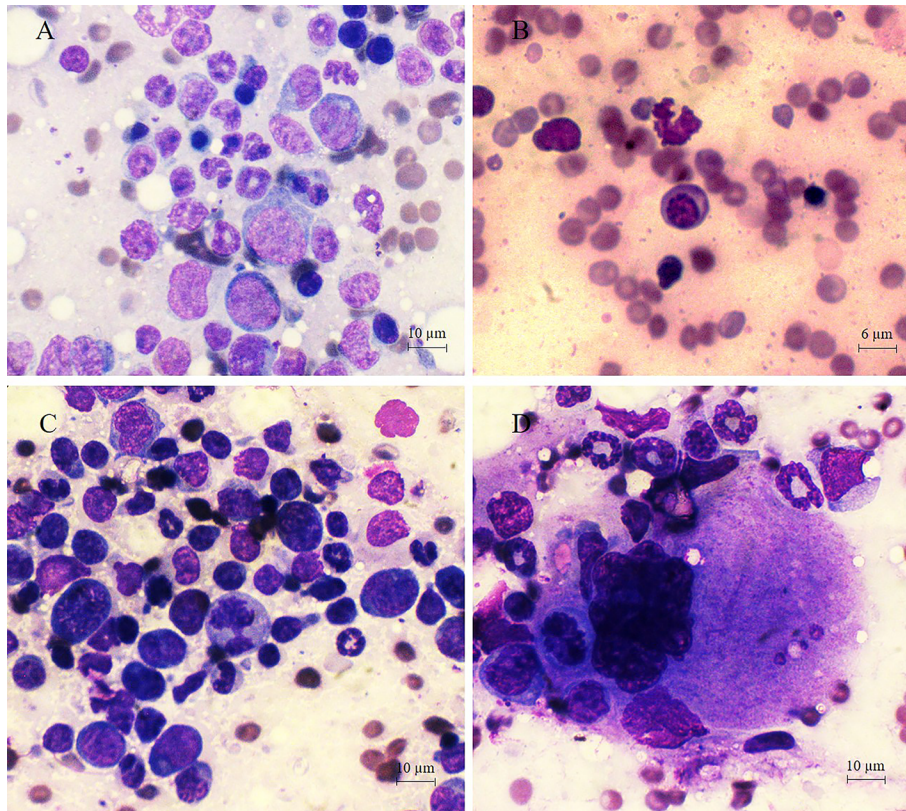

### S3 Figure Myelogram of *L. donovani*-infected BM

BM samples were obtained by aspiration biopsy from iliac crest using 24 G needle attached to a 5mL disposable plastic syringe with 10% EDTA and smears were stained with May–Grünwald Giemsa and analyzed by optical microscopy (Zeiss, Germany) and images using Zen software (Carl Zeiss). A Binucleated erythroid cell. B Megalocyte. C. Atypical mitosis. D Emperipolesis.



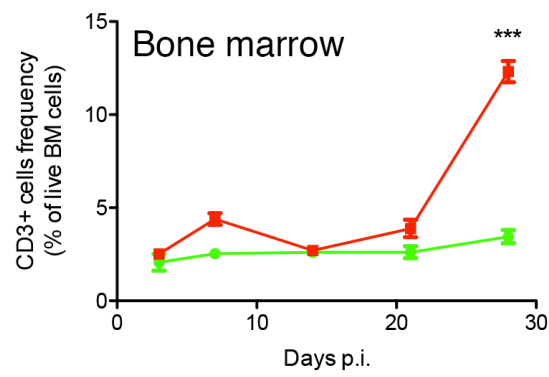

#### S4 Figure Frequency of T cells in bone marrow

Frequency of CD3<sup>+</sup> cells in the bone marrow of naïve (green) and *L. donovani*-infected (red) B6 mice over time. Unpaired t-test; n=3 mice per group per timepoint).

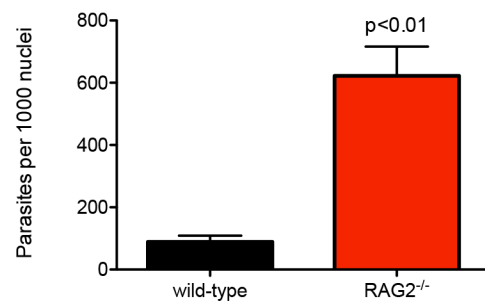

**S5 Figure. Parasite load in *L. donovani* infected B6 and B6.*Rag2*<sup>-/-</sup> mice.**

Parasites per 1000 nuclei in the spleen at d28 p.i.. Spleen impressions smears were made on glass slides and stained with Giemsa. Parasites and nuclei were counted microscopically. n=8 wild-type and 6 RAG2<sup>-/-</sup> mice from 2 independent experiments.

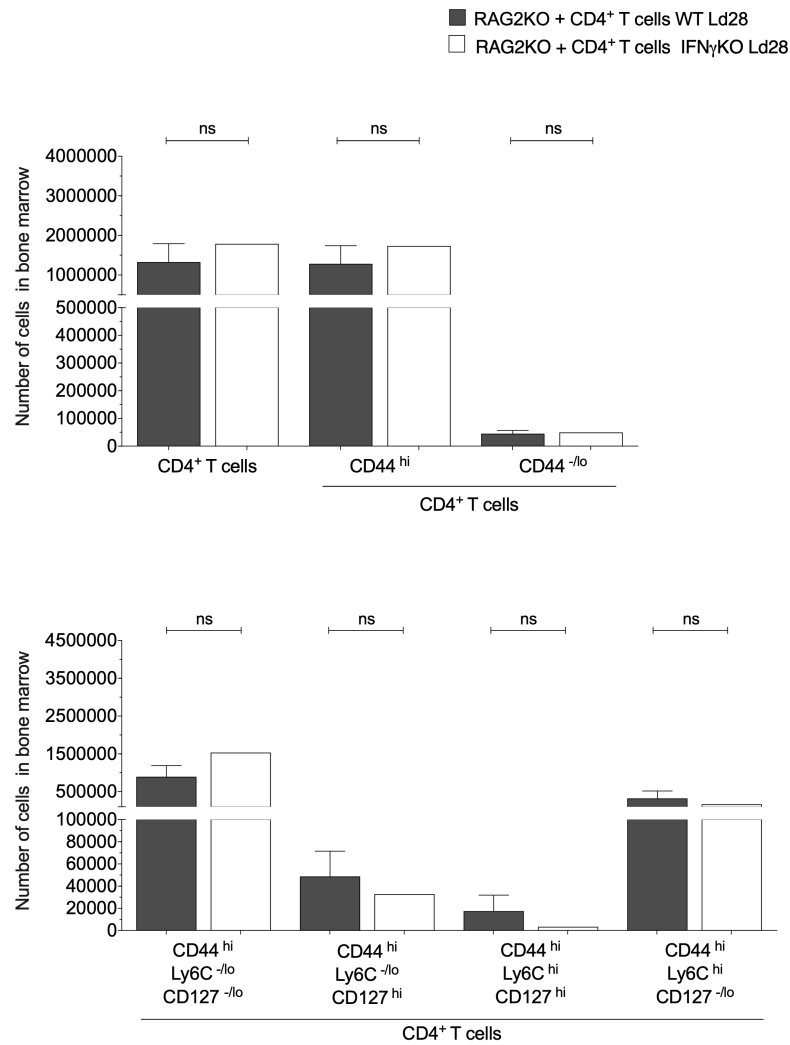

**S6 Figure. Number and differentiation state of wild type and IFN $\gamma$  KO CD4<sup>+</sup> T cells in RAG recipients.**

Wild type (black bars) or IFN $\gamma$  KO (open bars) CD4<sup>+</sup> T cells were transferred into RAG recipients prior to infection with *L. donovani*. At day 28 p.i., BM CD4<sup>+</sup> T cells were enumerated and characterized by flow cytometry. **A.** Number of total CD4<sup>+</sup> T cells and of CD4<sup>+</sup> T cells with CD44<sup>hi</sup> and CD44<sup>lo</sup> phenotype. **B.** Number of CD4<sup>+</sup> T cells expressing different expression patterns for Ly6C, CD44 and CD127. CD44<sup>hi</sup>Ly6C<sup>-lo</sup>CD127<sup>-lo</sup> are often regarded as classical effector cells. Two tibias and femurs were taken per mouse with n=4 mice receiving wild type T cells and n=5 mice receiving KO T cells.
